# Supplementary material for: A new computational approach to the study of epitaxy: the calcite/dolomite case
Source: Royal Society of Chemistry journal article supplement (doi:10.1039/c7ce00865a), 2017-01-01
Supplement: c7ce00865a1.xlsx [file c7ce00865a1.xlsx]

## Sheet: (10.4)Cc-(10.4)Dol
(10.4)Cc/(10.4)Dol interface					Ep(i) is the potential energy of the layer i, i =1,…, 60
E0	-15601.7
	eV		eV		eV	J	J/mole
E(1)	-246.439	E(-1)	-15344.8	Ep(1)	-251.679	-4.03235e-17	-2.42834e+07
E(2)	-245.464	E(-2)	-15335.7	Ep(2)	-255.738	-4.09737e-17	-2.4675e+07
E(3)	-245.625	E(-3)	-15336.3	Ep(3)	-255.539	-4.09418e-17	-2.46557e+07
E(4)	-245.607	E(-4)	-15336.1	Ep(4)	-255.602	-4.09519e-17	-2.46618e+07
E(5)	-245.612	E(-5)	-15336.1	Ep(5)	-255.594	-4.09507e-17	-2.46611e+07
E(6)	-245.613	E(-6)	-15336.1	Ep(6)	-255.594	-4.09507e-17	-2.46611e+07
E(7)	-245.612	E(-7)	-15336.1	Ep(7)	-255.595	-4.09508e-17	-2.46611e+07
E(8)	-245.613	E(-8)	-15336.1	Ep(8)	-255.594	-4.09507e-17	-2.46611e+07
E(9)	-245.613	E(-9)	-15336.1	Ep(9)	-255.594	-4.09507e-17	-2.46611e+07
E(10)	-245.613	E(-10)	-15336.1	Ep(10)	-255.594	-4.09507e-17	-2.46611e+07
E(11)	-245.613	E(-11)	-15336.1	Ep(11)	-255.594	-4.09507e-17	-2.46611e+07
E(12)	-245.614	E(-12)	-15336.1	Ep(12)	-255.594	-4.09507e-17	-2.46611e+07
E(13)	-245.613	E(-13)	-15336.1	Ep(13)	-255.594	-4.09506e-17	-2.46611e+07
E(14)	-245.614	E(-14)	-15336.1	Ep(14)	-255.594	-4.09507e-17	-2.46611e+07
E(15)	-245.613	E(-15)	-15336.1	Ep(15)	-255.594	-4.09506e-17	-2.4661e+07
E(16)	-245.614	E(-16)	-15336.1	Ep(16)	-255.594	-4.09507e-17	-2.46611e+07
E(17)	-245.613	E(-17)	-15336.1	Ep(17)	-255.594	-4.09506e-17	-2.4661e+07
E(18)	-245.613	E(-18)	-15336.1	Ep(18)	-255.594	-4.09507e-17	-2.46611e+07
E(19)	-245.613	E(-19)	-15336.1	Ep(19)	-255.594	-4.09506e-17	-2.4661e+07
E(20)	-245.613	E(-20)	-15336.1	Ep(20)	-255.594	-4.09507e-17	-2.46611e+07
E(21)	-245.613	E(-21)	-15336.1	Ep(21)	-255.594	-4.09506e-17	-2.4661e+07
E(22)	-245.612	E(-22)	-15336.1	Ep(22)	-255.594	-4.09507e-17	-2.46611e+07
E(23)	-245.613	E(-23)	-15336.1	Ep(23)	-255.594	-4.09507e-17	-2.46611e+07
E(24)	-245.609	E(-24)	-15336.1	Ep(24)	-255.593	-4.09505e-17	-2.4661e+07
E(25)	-245.613	E(-25)	-15336.1	Ep(25)	-255.595	-4.09508e-17	-2.46612e+07
E(26)	-245.602	E(-26)	-15336.1	Ep(26)	-255.597	-4.09511e-17	-2.46613e+07
E(27)	-245.652	E(-27)	-15336.3	Ep(27)	-255.515	-4.09381e-17	-2.46535e+07
E(28)	-245.605	E(-28)	-15336.1	Ep(28)	-255.632	-4.09568e-17	-2.46647e+07
E(29)	-245.452	E(-29)	-15336.9	Ep(29)	-255.118	-4.08744e-17	-2.46152e+07
E(30)	-245.479	E(-30)	-15336.2	Ep(30)	-255.471	-4.0931e-17	-2.46492e+07
E(31)	-252.485	E(-31)	-15325.6	Ep(31)	-264.322	-4.2349e-17	-2.55032e+07
E(32)	-252.588	E(-32)	-15324.7	Ep(32)	-264.815	-4.24281e-17	-2.55508e+07
E(33)	-252.501	E(-33)	-15324.9	Ep(33)	-264.673	-4.24052e-17	-2.5537e+07
E(34)	-252.53	E(-34)	-15324.6	Ep(34)	-264.8	-4.24256e-17	-2.55493e+07
E(35)	-252.519	E(-35)	-15324.8	Ep(35)	-264.737	-4.24156e-17	-2.55433e+07
E(36)	-252.527	E(-36)	-15324.7	Ep(36)	-264.772	-4.24211e-17	-2.55466e+07
E(37)	-252.524	E(-37)	-15324.7	Ep(37)	-264.754	-4.24183e-17	-2.55449e+07
E(38)	-252.526	E(-38)	-15324.7	Ep(38)	-264.764	-4.24199e-17	-2.55458e+07
E(39)	-252.526	E(-39)	-15324.7	Ep(39)	-264.759	-4.24191e-17	-2.55454e+07
E(40)	-252.527	E(-40)	-15324.7	Ep(40)	-264.762	-4.24195e-17	-2.55456e+07
E(41)	-252.527	E(-41)	-15324.7	Ep(41)	-264.76	-4.24193e-17	-2.55455e+07
E(42)	-252.528	E(-42)	-15324.7	Ep(42)	-264.761	-4.24194e-17	-2.55456e+07
E(43)	-252.529	E(-43)	-15324.7	Ep(43)	-264.761	-4.24194e-17	-2.55456e+07
E(44)	-252.529	E(-44)	-15324.7	Ep(44)	-264.761	-4.24194e-17	-2.55456e+07
E(45)	-252.53	E(-45)	-15324.7	Ep(45)	-264.761	-4.24194e-17	-2.55456e+07
E(46)	-252.531	E(-46)	-15324.7	Ep(46)	-264.761	-4.24195e-17	-2.55456e+07
E(47)	-252.532	E(-47)	-15324.7	Ep(47)	-264.762	-4.24195e-17	-2.55456e+07
E(48)	-252.534	E(-48)	-15324.7	Ep(48)	-264.762	-4.24195e-17	-2.55456e+07
E(49)	-252.536	E(-49)	-15324.7	Ep(49)	-264.762	-4.24196e-17	-2.55457e+07
E(50)	-252.537	E(-50)	-15324.7	Ep(50)	-264.762	-4.24195e-17	-2.55456e+07
E(51)	-252.54	E(-51)	-15324.7	Ep(51)	-264.764	-4.24199e-17	-2.55459e+07
E(52)	-252.541	E(-52)	-15324.7	Ep(52)	-264.76	-4.24192e-17	-2.55454e+07
E(53)	-252.546	E(-53)	-15324.7	Ep(53)	-264.769	-4.24207e-17	-2.55463e+07
E(54)	-252.545	E(-54)	-15324.7	Ep(54)	-264.753	-4.24181e-17	-2.55448e+07
E(55)	-252.554	E(-55)	-15324.7	Ep(55)	-264.784	-4.24231e-17	-2.55478e+07
E(56)	-252.543	E(-56)	-15324.8	Ep(56)	-264.725	-4.24136e-17	-2.55421e+07
E(57)	-252.563	E(-57)	-15324.6	Ep(57)	-264.835	-4.24312e-17	-2.55527e+07
E(58)	-252.505	E(-58)	-15325.1	Ep(58)	-264.569	-4.23886e-17	-2.5527e+07
E(59)	-252.557	E(-59)	-15324.6	Ep(59)	-264.838	-4.24318e-17	-2.5553e+07
E(60)	-254.407	E(-60)	-15334.6	Ep(60)	-260.777	-4.17811e-17	-2.51612e+07

## Sheet: (10.0)Cc-(10.0)Dol
(10.0)Cc/(10.0)Dol interface					Ep(i) is the potential energy of the layer i, i =1,…, 90
E0	-15599.5
	eV		eV		eV	J	J/mole
E(1)	-153.525	E(-1)	-15419.6	Ep(1)	-166.741	-2.67149e-17	-1.60881e+07
E(2)	-138.902	E(-2)	-15397.9	Ep(2)	-170.24	-2.72755e-17	-1.64257e+07
E(3)	-138.319	E(-3)	-15397.4	Ep(3)	-170.216	-2.72716e-17	-1.64233e+07
E(4)	-138.339	E(-4)	-15397.1	Ep(4)	-170.38	-2.72978e-17	-1.64391e+07
E(5)	-138.854	E(-5)	-15397.7	Ep(5)	-170.318	-2.7288e-17	-1.64332e+07
E(6)	-139.091	E(-6)	-15397.9	Ep(6)	-170.375	-2.7297e-17	-1.64386e+07
E(7)	-139.294	E(-7)	-15398.1	Ep(7)	-170.347	-2.72926e-17	-1.6436e+07
E(8)	-139.481	E(-8)	-15398.3	Ep(8)	-170.355	-2.72939e-17	-1.64368e+07
E(9)	-139.651	E(-9)	-15398.5	Ep(9)	-170.357	-2.72942e-17	-1.6437e+07
E(10)	-139.766	E(-10)	-15398.6	Ep(10)	-170.35	-2.72931e-17	-1.64363e+07
E(11)	-139.868	E(-11)	-15398.7	Ep(11)	-170.354	-2.72938e-17	-1.64367e+07
E(12)	-139.943	E(-12)	-15398.8	Ep(12)	-170.351	-2.72932e-17	-1.64364e+07
E(13)	-139.998	E(-13)	-15398.8	Ep(13)	-170.351	-2.72932e-17	-1.64364e+07
E(14)	-140.041	E(-14)	-15398.9	Ep(14)	-170.35	-2.72931e-17	-1.64363e+07
E(15)	-140.07	E(-15)	-15398.9	Ep(15)	-170.35	-2.7293e-17	-1.64362e+07
E(16)	-140.089	E(-16)	-15398.9	Ep(16)	-170.349	-2.7293e-17	-1.64362e+07
E(17)	-140.101	E(-17)	-15398.9	Ep(17)	-170.349	-2.72929e-17	-1.64362e+07
E(18)	-140.108	E(-18)	-15398.9	Ep(18)	-170.349	-2.72929e-17	-1.64362e+07
E(19)	-140.109	E(-19)	-15398.9	Ep(19)	-170.349	-2.72929e-17	-1.64361e+07
E(20)	-140.108	E(-20)	-15398.9	Ep(20)	-170.349	-2.72929e-17	-1.64362e+07
E(21)	-140.105	E(-21)	-15398.9	Ep(21)	-170.349	-2.72929e-17	-1.64362e+07
E(22)	-140.099	E(-22)	-15398.9	Ep(22)	-170.349	-2.72928e-17	-1.64361e+07
E(23)	-140.092	E(-23)	-15398.9	Ep(23)	-170.349	-2.72929e-17	-1.64362e+07
E(24)	-140.085	E(-24)	-15398.9	Ep(24)	-170.349	-2.72929e-17	-1.64362e+07
E(25)	-140.076	E(-25)	-15398.9	Ep(25)	-170.349	-2.72929e-17	-1.64362e+07
E(26)	-140.067	E(-26)	-15398.9	Ep(26)	-170.349	-2.72929e-17	-1.64362e+07
E(27)	-140.057	E(-27)	-15398.9	Ep(27)	-170.349	-2.72929e-17	-1.64362e+07
E(28)	-140.045	E(-28)	-15398.9	Ep(28)	-170.349	-2.7293e-17	-1.64362e+07
E(29)	-140.031	E(-29)	-15398.8	Ep(29)	-170.349	-2.7293e-17	-1.64362e+07
E(30)	-140.012	E(-30)	-15398.8	Ep(30)	-170.349	-2.7293e-17	-1.64362e+07
E(31)	-139.989	E(-31)	-15398.8	Ep(31)	-170.35	-2.72931e-17	-1.64363e+07
E(32)	-139.959	E(-32)	-15398.8	Ep(32)	-170.35	-2.72931e-17	-1.64363e+07
E(33)	-139.917	E(-33)	-15398.7	Ep(33)	-170.351	-2.72932e-17	-1.64363e+07
E(34)	-139.862	E(-34)	-15398.7	Ep(34)	-170.352	-2.72933e-17	-1.64364e+07
E(35)	-139.785	E(-35)	-15398.6	Ep(35)	-170.352	-2.72934e-17	-1.64365e+07
E(36)	-139.683	E(-36)	-15398.5	Ep(36)	-170.353	-2.72936e-17	-1.64366e+07
E(37)	-139.545	E(-37)	-15398.3	Ep(37)	-170.354	-2.72938e-17	-1.64367e+07
E(38)	-139.364	E(-38)	-15398.2	Ep(38)	-170.354	-2.72937e-17	-1.64366e+07
E(39)	-139.125	E(-39)	-15397.9	Ep(39)	-170.356	-2.7294e-17	-1.64368e+07
E(40)	-138.829	E(-40)	-15397.6	Ep(40)	-170.347	-2.72926e-17	-1.6436e+07
E(41)	-138.486	E(-41)	-15397.3	Ep(41)	-170.35	-2.72932e-17	-1.64363e+07
E(42)	-138.014	E(-42)	-15396.9	Ep(42)	-170.339	-2.72913e-17	-1.64352e+07
E(43)	-137.639	E(-43)	-15396.7	Ep(43)	-170.234	-2.72745e-17	-1.64251e+07
E(44)	-137.297	E(-44)	-15396	Ep(44)	-170.403	-2.73016e-17	-1.64414e+07
E(45)	-136.279	E(-45)	-15394.9	Ep(45)	-170.441	-2.73076e-17	-1.6445e+07
E(46)	-139.778	E(-46)	-15386.8	Ep(46)	-176.222	-2.82339e-17	-1.70029e+07
E(47)	-138.928	E(-47)	-15385.8	Ep(47)	-176.306	-2.82474e-17	-1.7011e+07
E(48)	-138.531	E(-48)	-15385	Ep(48)	-176.523	-2.8282e-17	-1.70318e+07
E(49)	-138.486	E(-49)	-15385.1	Ep(49)	-176.472	-2.8274e-17	-1.7027e+07
E(50)	-138.325	E(-50)	-15384.9	Ep(50)	-176.491	-2.8277e-17	-1.70288e+07
E(51)	-138.246	E(-51)	-15384.8	Ep(51)	-176.493	-2.82772e-17	-1.70289e+07
E(52)	-138.185	E(-52)	-15384.7	Ep(52)	-176.484	-2.82759e-17	-1.70282e+07
E(53)	-138.123	E(-53)	-15384.7	Ep(53)	-176.485	-2.8276e-17	-1.70282e+07
E(54)	-138.074	E(-54)	-15384.6	Ep(54)	-176.485	-2.8276e-17	-1.70282e+07
E(55)	-138.04	E(-55)	-15384.6	Ep(55)	-176.482	-2.82756e-17	-1.70279e+07
E(56)	-138.011	E(-56)	-15384.6	Ep(56)	-176.481	-2.82753e-17	-1.70278e+07
E(57)	-137.989	E(-57)	-15384.5	Ep(57)	-176.48	-2.82751e-17	-1.70277e+07
E(58)	-137.973	E(-58)	-15384.5	Ep(58)	-176.478	-2.82749e-17	-1.70276e+07
E(59)	-137.961	E(-59)	-15384.5	Ep(59)	-176.477	-2.82748e-17	-1.70275e+07
E(60)	-137.952	E(-60)	-15384.5	Ep(60)	-176.476	-2.82746e-17	-1.70274e+07
E(61)	-137.946	E(-61)	-15384.5	Ep(61)	-176.476	-2.82745e-17	-1.70273e+07
E(62)	-137.942	E(-62)	-15384.5	Ep(62)	-176.475	-2.82744e-17	-1.70272e+07
E(63)	-137.939	E(-63)	-15384.5	Ep(63)	-176.475	-2.82744e-17	-1.70272e+07
E(64)	-137.937	E(-64)	-15384.5	Ep(64)	-176.474	-2.82743e-17	-1.70272e+07
E(65)	-137.936	E(-65)	-15384.5	Ep(65)	-176.474	-2.82742e-17	-1.70271e+07
E(66)	-137.935	E(-66)	-15384.5	Ep(66)	-176.474	-2.82743e-17	-1.70272e+07
E(67)	-137.935	E(-67)	-15384.5	Ep(67)	-176.474	-2.82743e-17	-1.70272e+07
E(68)	-137.935	E(-68)	-15384.5	Ep(68)	-176.474	-2.82743e-17	-1.70272e+07
E(69)	-137.935	E(-69)	-15384.5	Ep(69)	-176.475	-2.82744e-17	-1.70272e+07
E(70)	-137.936	E(-70)	-15384.5	Ep(70)	-176.475	-2.82744e-17	-1.70273e+07
E(71)	-137.936	E(-71)	-15384.5	Ep(71)	-176.476	-2.82745e-17	-1.70273e+07
E(72)	-137.937	E(-72)	-15384.5	Ep(72)	-176.476	-2.82746e-17	-1.70274e+07
E(73)	-137.938	E(-73)	-15384.5	Ep(73)	-176.477	-2.82748e-17	-1.70275e+07
E(74)	-137.939	E(-74)	-15384.5	Ep(74)	-176.478	-2.82749e-17	-1.70276e+07
E(75)	-137.941	E(-75)	-15384.5	Ep(75)	-176.479	-2.82751e-17	-1.70277e+07
E(76)	-137.944	E(-76)	-15384.5	Ep(76)	-176.481	-2.82753e-17	-1.70278e+07
E(77)	-137.947	E(-77)	-15384.5	Ep(77)	-176.481	-2.82754e-17	-1.70279e+07
E(78)	-137.953	E(-78)	-15384.5	Ep(78)	-176.483	-2.82756e-17	-1.7028e+07
E(79)	-137.96	E(-79)	-15384.5	Ep(79)	-176.485	-2.8276e-17	-1.70282e+07
E(80)	-137.97	E(-80)	-15384.5	Ep(80)	-176.485	-2.8276e-17	-1.70282e+07
E(81)	-137.988	E(-81)	-15384.5	Ep(81)	-176.487	-2.82763e-17	-1.70284e+07
E(82)	-138.008	E(-82)	-15384.5	Ep(82)	-176.489	-2.82766e-17	-1.70286e+07
E(83)	-138.059	E(-83)	-15384.6	Ep(83)	-176.487	-2.82763e-17	-1.70284e+07
E(84)	-138.111	E(-84)	-15384.6	Ep(84)	-176.492	-2.82771e-17	-1.70289e+07
E(85)	-138.15	E(-85)	-15384.6	Ep(85)	-176.523	-2.82821e-17	-1.70319e+07
E(86)	-138.41	E(-86)	-15385.2	Ep(86)	-176.369	-2.82574e-17	-1.7017e+07
E(87)	-138.229	E(-87)	-15384.3	Ep(87)	-176.726	-2.83146e-17	-1.70514e+07
E(88)	-138.69	E(-88)	-15386	Ep(88)	-176.11	-2.8216e-17	-1.69921e+07
E(89)	-140.223	E(-89)	-15387.6	Ep(89)	-176.056	-2.82072e-17	-1.69868e+07
E(90)	-158.635	E(-90)	-15411.3	Ep(90)	-173.437	-2.77876e-17	-1.67341e+07

## Sheet: (11.0)Cc-(11.0)Dol
(11.0)Cc/(11.0)Dol interface					Ep(i) is the potential energy of the layer i, i =1,…, 60
E0	-15596.5
	eV		eV		eV	J	J/mole
E(1)	-233.585	E(-1)	-15331.8	Ep(1)	-249.146	-3.99177e-17	-2.4039e+07
E(2)	-219.609	E(-2)	-15304.5	Ep(2)	-255.818	-4.09865e-17	-2.46827e+07
E(3)	-219.466	E(-3)	-15305.3	Ep(3)	-255.34	-4.09099e-17	-2.46365e+07
E(4)	-219.968	E(-4)	-15305.3	Ep(4)	-255.564	-4.09459e-17	-2.46582e+07
E(5)	-219.641	E(-5)	-15305	Ep(5)	-255.588	-4.09497e-17	-2.46605e+07
E(6)	-219.962	E(-6)	-15305.3	Ep(6)	-255.588	-4.09497e-17	-2.46605e+07
E(7)	-219.806	E(-7)	-15305.1	Ep(7)	-255.603	-4.09521e-17	-2.4662e+07
E(8)	-219.916	E(-8)	-15305.2	Ep(8)	-255.606	-4.09525e-17	-2.46622e+07
E(9)	-219.858	E(-9)	-15305.2	Ep(9)	-255.602	-4.0952e-17	-2.46619e+07
E(10)	-219.9	E(-10)	-15305.2	Ep(10)	-255.608	-4.09529e-17	-2.46624e+07
E(11)	-219.888	E(-11)	-15305.2	Ep(11)	-255.599	-4.09515e-17	-2.46616e+07
E(12)	-219.898	E(-12)	-15305.2	Ep(12)	-255.608	-4.09529e-17	-2.46624e+07
E(13)	-219.902	E(-13)	-15305.2	Ep(13)	-255.6	-4.09516e-17	-2.46616e+07
E(14)	-219.904	E(-14)	-15305.2	Ep(14)	-255.606	-4.09525e-17	-2.46622e+07
E(15)	-219.911	E(-15)	-15305.2	Ep(15)	-255.6	-4.09517e-17	-2.46617e+07
E(16)	-219.912	E(-16)	-15305.2	Ep(16)	-255.603	-4.09521e-17	-2.46619e+07
E(17)	-219.916	E(-17)	-15305.2	Ep(17)	-255.601	-4.09519e-17	-2.46618e+07
E(18)	-219.92	E(-18)	-15305.2	Ep(18)	-255.601	-4.09518e-17	-2.46617e+07
E(19)	-219.921	E(-19)	-15305.2	Ep(19)	-255.602	-4.0952e-17	-2.46619e+07
E(20)	-219.926	E(-20)	-15305.2	Ep(20)	-255.598	-4.09514e-17	-2.46615e+07
E(21)	-219.925	E(-21)	-15305.2	Ep(21)	-255.603	-4.09522e-17	-2.4662e+07
E(22)	-219.927	E(-22)	-15305.2	Ep(22)	-255.598	-4.09513e-17	-2.46615e+07
E(23)	-219.93	E(-23)	-15305.2	Ep(23)	-255.605	-4.09525e-17	-2.46622e+07
E(24)	-219.92	E(-24)	-15305.2	Ep(24)	-255.599	-4.09515e-17	-2.46616e+07
E(25)	-219.939	E(-25)	-15305.2	Ep(25)	-255.606	-4.09527e-17	-2.46623e+07
E(26)	-219.842	E(-26)	-15305.1	Ep(26)	-255.61	-4.09533e-17	-2.46626e+07
E(27)	-219.883	E(-27)	-15305.1	Ep(27)	-255.621	-4.09549e-17	-2.46636e+07
E(28)	-219.774	E(-28)	-15304.9	Ep(28)	-255.675	-4.09637e-17	-2.46689e+07
E(29)	-219.916	E(-29)	-15305.5	Ep(29)	-255.445	-4.09268e-17	-2.46467e+07
E(30)	-219.08	E(-30)	-15304.8	Ep(30)	-255.398	-4.09193e-17	-2.46422e+07
E(31)	-224.848	E(-31)	-15292.9	Ep(31)	-264.242	-4.23362e-17	-2.54955e+07
E(32)	-223.506	E(-32)	-15290.8	Ep(32)	-264.586	-4.23913e-17	-2.55286e+07
E(33)	-223.548	E(-33)	-15290.4	Ep(33)	-264.818	-4.24286e-17	-2.55511e+07
E(34)	-223.55	E(-34)	-15290.5	Ep(34)	-264.764	-4.24199e-17	-2.55458e+07
E(35)	-223.559	E(-35)	-15290.4	Ep(35)	-264.807	-4.24268e-17	-2.555e+07
E(36)	-223.564	E(-36)	-15290.5	Ep(36)	-264.784	-4.2423e-17	-2.55478e+07
E(37)	-223.554	E(-37)	-15290.5	Ep(37)	-264.792	-4.24244e-17	-2.55486e+07
E(38)	-223.559	E(-38)	-15290.5	Ep(38)	-264.793	-4.24245e-17	-2.55487e+07
E(39)	-223.555	E(-39)	-15290.5	Ep(39)	-264.792	-4.24243e-17	-2.55485e+07
E(40)	-223.556	E(-40)	-15290.5	Ep(40)	-264.793	-4.24244e-17	-2.55486e+07
E(41)	-223.553	E(-41)	-15290.5	Ep(41)	-264.792	-4.24244e-17	-2.55486e+07
E(42)	-223.553	E(-42)	-15290.5	Ep(42)	-264.793	-4.24245e-17	-2.55486e+07
E(43)	-223.552	E(-43)	-15290.5	Ep(43)	-264.793	-4.24244e-17	-2.55486e+07
E(44)	-223.551	E(-44)	-15290.5	Ep(44)	-264.793	-4.24245e-17	-2.55486e+07
E(45)	-223.551	E(-45)	-15290.5	Ep(45)	-264.793	-4.24245e-17	-2.55487e+07
E(46)	-223.55	E(-46)	-15290.5	Ep(46)	-264.793	-4.24245e-17	-2.55486e+07
E(47)	-223.551	E(-47)	-15290.5	Ep(47)	-264.794	-4.24247e-17	-2.55487e+07
E(48)	-223.548	E(-48)	-15290.5	Ep(48)	-264.792	-4.24244e-17	-2.55486e+07
E(49)	-223.554	E(-49)	-15290.5	Ep(49)	-264.796	-4.24249e-17	-2.55489e+07
E(50)	-223.545	E(-50)	-15290.5	Ep(50)	-264.79	-4.2424e-17	-2.55483e+07
E(51)	-223.56	E(-51)	-15290.5	Ep(51)	-264.8	-4.24256e-17	-2.55493e+07
E(52)	-223.535	E(-52)	-15290.5	Ep(52)	-264.782	-4.24228e-17	-2.55476e+07
E(53)	-223.578	E(-53)	-15290.5	Ep(53)	-264.813	-4.24278e-17	-2.55506e+07
E(54)	-223.509	E(-54)	-15290.5	Ep(54)	-264.754	-4.24182e-17	-2.55448e+07
E(55)	-223.623	E(-55)	-15290.4	Ep(55)	-264.856	-4.24346e-17	-2.55547e+07
E(56)	-223.408	E(-56)	-15290.6	Ep(56)	-264.674	-4.24054e-17	-2.55372e+07
E(57)	-223.738	E(-57)	-15290.4	Ep(57)	-264.899	-4.24416e-17	-2.55589e+07
E(58)	-223.009	E(-58)	-15290.6	Ep(58)	-264.433	-4.23669e-17	-2.55139e+07
E(59)	-222.587	E(-59)	-15288.7	Ep(59)	-265.172	-4.24852e-17	-2.55852e+07
E(60)	-238.268	E(-60)	-15320.8	Ep(60)	-256.975	-4.1172e-17	-2.47943e+07
